# Supplementary material for: Dominance of Bacillus species in the wheat (Triticum aestivum L.) rhizosphere and their plant growth promoting potential under salt stress conditions
Source: PeerJ. 2023 Jan 9;11:e14621. doi: 10.7717/peerj.14621 (PMC9835707; doi:10.7717/peerj.14621)
Supplement: Supplemental Information 1 [file peerj-11-14621-s001.xlsx]

## Sheet: Sheet1
					Figure 1 raw data
					Bacterial growth (OD) at different salt levels after every 6 h
						WGT1
					Time (h)	0% NaCl	0.5% NaCl	1% NaCl	1.5% NaCl	2% NaCl	3% NaCl	4% NaCl
					0	0.002	0.002	0.002	0.002	0.002	0.002	0.002
					6	0.982	0.961	0.892	0.621	0.552	0.493	0.317
					12	1.818	1.782	1.741	1.616	1.514	1.364	0.627
					18	1.856	1.852	1.85	1.676	1.581	1.481	1.406
					24	1.998	1.99	1.95	1.792	1.73	1.52	1.406
					30	2.019	2.018	1.967	1.808	1.652	1.576	1.416
					36	2.013	1.997	1.93	1.747	1.647	1.546	1.403
					42	2.012	1.893	1.882	1.735	1.575	1.538	1.383
						WGT2
					Time (h)	0% NaCl	0.5% NaCl	1% NaCl	1.5% NaCl	2% NaCl	3% NaCl	4% NaCl
					0	0.002	0.002	0.002	0.002	0.002	0.002	0.002
					6	0.967	0.952	0.943	0.92	0.892	0.621	0.492
					12	1.856	1.852	1.85	1.655	1.581	1.481	1.46
					18	1.984	1.973	1.957	1.676	1.491	1.489	1.522
					24	2.053	1.986	1.962	1.892	1.52	1.512	1.502
					30	2.059	2.047	2.022	1.613	1.509	1.5	1.43
					36	2.026	1.992	1.986	1.506	1.496	1.492	1.409
					42	2.003	1.914	1.912	1.497	1.464	1.433	1.408
						WGT3
					Time (h)	0% NaCl	0.5% NaCl	1% NaCl	1.5% NaCl	2% NaCl	3% NaCl	4% NaCl
					0	0.002	0.002	0.002	0.002	0.002	0.002	0.002
					6	0.897	0.969	0.923	0.896	0.749	0.621	0.386
					12	1.811	1.789	1.776	1.565	1.56	0.836	0.402
					18	1.817	1.805	1.781	1.662	1.638	1.517	0.97
					24	1.837	1.829	1.809	1.726	1.709	1.634	1.58
					30	1.807	1.806	1.77	1.615	1.575	1.559	1.52
					36	1.74	1.738	1.737	1.592	1.574	1.448	1.432
					42	1.729	1.728	1.709	1.459	1.405	1.38	1.304
						WGT6
					Time (h)	0% NaCl	0.5% NaCl	1% NaCl	1.5% NaCl	2% NaCl	3% NaCl	4% NaCl
					0	0.002	0.002	0.002	0.002	0.002	0.002	0.002
					6	0.967	0.578	0.529	0.496	0.461	0.396	0.369
					12	1.649	0.685	0.622	0.588	0.485	0.462	0.441
					18	1.684	0.767	0.755	0.647	0.558	0.489	0.481
					24	1.885	1.882	1.837	0.755	0.595	0.568	0.527
					30	1.901	1.866	1.839	1.43	1.122	0.682	0.554
					36	1.955	1.926	1.885	1.58	1.195	1.129	1.124
					42	1.929	1.914	1.826	1.314	1.182	1.121	1.112
						WGT8
					Time (h)	0% NaCl	0.5% NaCl	1% NaCl	1.5% NaCl	2% NaCl	3% NaCl	4% NaCl
					0	0.002	0.002	0.002	0.002	0.002	0.002	0.002
					6	0.996	0.962	0.931	0.892	0.196	0.176	0.129
					12	1.617	1.574	1.547	1.524	0.235	0.215	0.197
					18	1.798	1.727	1.705	1.671	0.955	0.847	0.389
					24	2.112	2.035	2.015	1.917	1.674	1.517	0.621
					30	2.191	2.065	2.024	1.922	1.915	1.789	0.937
					36	2.132	2.091	2.081	2.071	2.066	2.023	1.964
					42	2.126	2.084	2.076	2.069	2.057	2.019	1.689
						WGT11
					Time (h)	0% NaCl	0.5% NaCl	1% NaCl	1.5% NaCl	2% NaCl	3% NaCl	4% NaCl
					0	0.002	0.002	0.002	0.002	0.002	0.002	0.002
					6	0.394	0.197	0.127	0.114	0.016	0.009	0.006
					12	0.499	0.213	0.155	0.131	0.023	0.012	0.009
					18	0.562	0.278	0.22	0.17	0.104	0.106	0.045
					24	1.642	1.577	1.554	1.519	1.484	1.456	0.988
					30	1.669	1.647	1.637	1.571	1.515	1.423	1.362
					36	1.665	1.646	1.506	1.396	1.277	1.125	1.117
					42	1.659	1.639	1.502	1.337	1.267	1.107	1.104
