# Supplementary material for: Dominance of Bacillus species in the wheat (Triticum aestivum L.) rhizosphere and their plant growth promoting potential under salt stress conditions
Source: PeerJ. 2023 Jan 9;11:e14621. doi: 10.7717/peerj.14621 (PMC9835707; doi:10.7717/peerj.14621)
Supplement: Supplemental Information 3 [file peerj-11-14621-s003.xlsx]

## Sheet: Sheet1
						Table 2 raw data
				Biofilm formation of wheat isolates (OD 570 nm)
				WGT1	WGT2	WGT3	WGT4	WGT5	WGT6	WGT7	WGT8	WGT9	WGT10	WGT11
			A	0.187	0.356	0.643	1.675	0.404	0.167	0.211	0.698	0.543	0.399	0.245
			B	0.231	0.431	0.878	1.774	0.423	0.198	0.298	0.704	0.525	0.425	0.311
			C	0.267	0.412	0.744	1.815	0.532	0.154	0.207	0.715	0.576	0.416	0.342
			D	0.199	0.399	0.792	1.843	0.413	0.204	0.234	0.734	0.413	0.487	0.219
			E	0.174	0.376	0.616	1.753	0.409	0.133	0.276	0.698	0.506	0.452	0.276
			Average	0.2116	0.3948	0.7346	1.772	0.4362	0.1712	0.2452	0.7098	0.5126	0.4358	0.2786
			SD	0.037494	0.0295076	0.107707	0.0645446	0.0540065	0.0298613	0.0402828	0.0152053	0.061362	0.0344485	0.0493893
			SE	0.0167678	0.0131962	0.048168	0.0288652	0.0241524	0.0133544	0.018015	0.0068	0.0274419	0.0154058	0.0220876
				Phosphate solubilization of wheat isolates (µg m/L)
			Isolates	R1	R2	R3	MEAN	SD	SE
			WGT1	9.3	8.6	8.8	8.9	0.360555	0.255713
			WGT2	13.6	11.6	11.6	12.2667	1.1547	0.818937
			WGT3	0	0	0	0	0	0
			WGT4	0	0	0	0	0	0
			WGT5	1.4	1.6	1.2	1.4	0.2	0.141844
			WGT6	0	0	0	0	0	0
			WGT7	0	0	0	0	0	0
			WGT8	0	0	0	0	0	0
			WGT9	0	0	0	0	0	0
			WGT10	1.8	1.6	1.6	1.66667	0.11547	0.0818937
			WGT11	3.9	3.5	4.1	3.83333	0.305505	0.21667
				IAA production of wheat isolates (µg m/L)
			isolates	R1	R2	R3	MEAN	SD	SE
			WGT1	4.9	5.1	4.7	4.9	0.2	0.141844
			WGT2	0	0	0	0	0	0
			WGT3	3.7	3.3	3.9	3.63333	0.305505	0.21667
			WGT4	1.02	0.6	0.7	0.773333	0.219393	0.155598
			WGT5	0	0	0	0	0	0
			WGT6	3.5	4	3.2	3.56667	0.404145	0.286628
			WGT7	0	0	0	0	0	0
			WGT8	6	5.7	6.4	6.03333	0.351188	0.24907
			WGT9	2.5	3.1	2.5	2.7	0.34641	0.245681
			WGT10	0	0	0	0	0	0
			WGT11	0	0	0	0	0	0
				Nitrogen fixation of wheat isolates
						(n mole C2H2 reduced h-1mg-1 protein)
			isolates	R1	R2	R3	MEAM	SD	SR
			WGT1	61.5	69.5	69	66.6667	4.48144	3.17833
			WGT2	0	0	0	0	0	0
			WGT3	0	0	0	0	0	0
			WGT4	0	0	0	0	0	0
			WGT5	0	0	0	0	0	0
			WGT6	0	0	0	0	0	0
			WGT7	0	0	0	0	0	0
			WGT8	52.5	56.8	59.5	56.2667	3.53034	2.50379
			WGT9	0	0	0	0	0	0
			WGT10	0	0	0	0	0	0
			WGT11	0	0	0	0	0	0
				Zinc solubilization of wheat isolates
				colony diameter (mm)		zone diameter (mm)		solubilization efficiency
			isolates	ZnO	ZnCo3	ZnO	ZnCo3	ZnO	ZnCo3
			WGT1	10	4	25	8	2.5	2
			WGT2	0	0	0	0	0	0
			WGT3	0	0	0	0	0	0
			WGT4	0	0	0	0	0	0
			WGT5	0	0	0	0	0	0
			WGT6	0	0	0	0	0	0
			WGT7	0	0	0	0	0	0
			WGT8	0	0	0	0	0	0
			WGT9	0	0	0	0	0	0
			WGT10	0	0	0	0	0	0
			WGT11	6	5.5	12	9.7	2	1.76
